# Supplementary material for: Propofol, Ketamine, and Etomidate as Induction Agents for Intubation and Outcomes in Critically Ill Patients: A Retrospective Cohort Study
Source: PubMed Central journal article supplement — Crit Care Explor. 2021 May 24;3(5):e0435. doi: 10.1097/CCE.0000000000000435 (PMC8148417; doi:10.1097/cce.0000000000000435), 2021-05-24
Supplement: cc9-3-e0435-s001.pdf [file cc9-3-e0435-s001.pdf]

## Propofol, Ketamine and Etomidate as Induction Agents for Intubation and Outcomes in Critically Ill Patients: Supplemental Data

Table 1S-A – Patient demographics and ICU admission characteristics according to medication\*

|                                                          | Unweighted statistics |        |                     |        |                      |        | Weighted statistics |      |      |          |        |          |        |           |        |             |      |      |
|----------------------------------------------------------|-----------------------|--------|---------------------|--------|----------------------|--------|---------------------|------|------|----------|--------|----------|--------|-----------|--------|-------------|------|------|
|                                                          | Propofol<br>(n=962)   |        | Ketamine<br>(n=792) |        | Etomidate<br>(n=919) |        | Std. Diff.‡         |      |      | Propofol |        | Ketamine |        | Etomidate |        | Std. Diff.‡ |      |      |
| Age (y)                                                  | 61.3                  | (15.8) | 64.2                | (15.4) | 64.5                 | (16.0) | 0.19                | 0.20 | 0.02 | 63.2     | (15.7) | 63.7     | (15.5) | 63.3      | (15.9) | 0.03        | <.01 | 0.03 |
| Sex                                                      |                       |        |                     |        |                      |        |                     |      |      |          |        |          |        |           |        |             |      |      |
| Female                                                   | 400                   | (42%)  | 321                 | (41%)  | 387                  | (42%)  | 0.02                | 0.01 | 0.03 | (41%)    |        | (46%)    |        | (41%)     |        | 0.09        | <.01 | 0.09 |
| Male                                                     | 562                   | (58%)  | 471                 | (59%)  | 532                  | (58%)  | 0.02                | 0.01 | 0.03 | (59%)    |        | (54%)    |        | (59%)     |        | 0.09        | <.01 | 0.09 |
| BMI (kg/m <sup>2</sup> )                                 | 29.2                  | (8.5)  | 29.1                | (8.1)  | 29.1                 | (8.2)  | 0.01                | 0.01 | <.01 | 28.8     | (8.2)  | 29.3     | (8.3)  | 29.1      | (8.1)  | 0.06        | 0.04 | 0.03 |
| Readmission†                                             | 145                   | (15%)  | 124                 | (16%)  | 140                  | (15%)  | 0.02                | <.01 | 0.01 | (16%)    |        | (15%)    |        | (16%)     |        | 0.04        | 0.02 | 0.03 |
| Invasive ventilation within 24 hours prior to intubation | 25                    | (3%)   | 22                  | (3%)   | 29                   | (3%)   | 0.01                | 0.03 | 0.02 | (3%)     |        | (2%)     |        | (4%)      |        | 0.02        | 0.06 | 0.07 |
| Admission source                                         |                       |        |                     |        |                      |        |                     |      |      |          |        |          |        |           |        |             |      |      |
| Surgery/procedure                                        | 117                   | (12%)  | 72                  | (9%)   | 60                   | (7%)   | 0.10                | 0.19 | 0.10 | (12%)    |        | (12%)    |        | (10%)     |        | 0.02        | 0.06 | 0.09 |
| Direct admission ICU                                     | 181                   | (19%)  | 163                 | (21%)  | 188                  | (20%)  | 0.04                | 0.04 | <.01 | (20%)    |        | (18%)    |        | (20%)     |        | 0.04        | <.01 | 0.05 |
| Emergency department                                     | 170                   | (18%)  | 149                 | (19%)  | 230                  | (25%)  | 0.03                | 0.18 | 0.15 | (19%)    |        | (22%)    |        | (20%)     |        | 0.07        | 0.03 | 0.04 |
| Hospital floor                                           | 469                   | (49%)  | 386                 | (49%)  | 421                  | (46%)  | <.01                | 0.06 | 0.06 | (47%)    |        | (45%)    |        | (48%)     |        | 0.04        | <.01 | 0.05 |
| Transfer from another ICU                                | 25                    | (3%)   | 22                  | (3%)   | 20                   | (2%)   | 0.01                | 0.03 | 0.04 | (2%)     |        | (3%)     |        | (3%)      |        | <.01        | <.01 | <.01 |
| Admission ICU                                            |                       |        |                     |        |                      |        |                     |      |      |          |        |          |        |           |        |             |      |      |
| Cardiac surgical                                         | 76                    | (8%)   | 97                  | (12%)  | 22                   | (2%)   | 0.14                | 0.25 | 0.39 | (7%)     |        | (7%)     |        | (7%)      |        | <.01        | 0.01 | <.01 |
| Medical/Surgical/Transplant                              | 217                   | (23%)  | 169                 | (21%)  | 114                  | (12%)  | 0.03                | 0.27 | 0.24 | (19%)    |        | (18%)    |        | (19%)     |        | <.01        | <.01 | 0.01 |
| Cardiac medical                                          | 33                    | (3%)   | 57                  | (7%)   | 98                   | (11%)  | 0.17                | 0.29 | 0.12 | (7%)     |        | (7%)     |        | (7%)      |        | <.01        | <.01 | <.01 |
| Trauma/general surgical                                  | 21                    | (2%)   | 83                  | (10%)  | 183                  | (20%)  | 0.35                | 0.59 | 0.27 | (11%)    |        | (10%)    |        | (11%)     |        | 0.03        | 0.02 | 0.01 |
| Vascular/thoracic surgical                               | 165                   | (17%)  | 53                  | (7%)   | 74                   | (8%)   | 0.33                | 0.28 | 0.05 | (11%)    |        | (11%)    |        | (11%)     |        | <.01        | <.01 | <.01 |

Table 1S-A – Patient demographics and ICU admission characteristics according to medication\*

|                                         | Unweighted statistics |                     |                      |             |      |      | Weighted statistics |             |             |             |      |      |
|-----------------------------------------|-----------------------|---------------------|----------------------|-------------|------|------|---------------------|-------------|-------------|-------------|------|------|
|                                         | Propofol<br>(n=962)   | Ketamine<br>(n=792) | Etomidate<br>(n=919) | Std. Diff.‡ |      |      | Propofol            | Ketamine    | Etomidate   | Std. Diff.‡ |      |      |
| Neuroscience                            | 181 (19%)             | 6 (1%)              | 23 (3%)              | 0.64        | 0.55 | 0.11 | (8%)                | (9%)        | (8%)        | 0.05        | 0.01 | 0.03 |
| Medical ICU                             | 269 (28%)             | 327 (41%)           | 405 (44%)            | 0.28        | 0.34 | 0.06 | (37%)               | (37%)       | (37%)       | <.01        | <.01 | <.01 |
| ICU length of stay (h) §                | 5 (1, 23)             | 7 (2, 34)           | 6 (2, 29)            | 0.05        | 0.01 | 0.12 | 5 (1, 26)           | 7 (2, 34)   | 6 (2, 27)   | <.01        | 0.03 | 0.07 |
| Last MAP within 6 hours of intubation** | 78 (22)               | 71 (25)             | 73 (25)              | 0.29        | 0.24 | 0.05 | 77 (22)             | 73 (24)     | 73 (25)     | 0.18        | 0.17 | <.01 |
| Acute physiology score (APS)            | 63.4 (20.3)           | 70.2 (20.6)         | 68.3 (20.8)          | 0.33        | 0.24 | 0.09 | 67.7 (21.1)         | 66.9 (20.6) | 67.3 (20.5) | 0.04        | 0.02 | 0.02 |
| SOFA score                              | 5.1 (3.4)             | 6.6 (4.0)           | 6.1 (3.8)            | 0.42        | 0.29 | 0.14 | 5.4 (3.4)           | 6.4 (4.1)   | 6.2 (3.9)   | 0.27        | 0.21 | 0.06 |
| Respiratory                             | 0 (0, 2)              | 2 (0, 2)            | 2 (0, 2)             | 0.27        | 0.30 | 0.04 | 1 (0, 2)            | 2 (0, 2)    | 2 (0, 2)    | 0.14        | 0.17 | 0.03 |
| Coagulation                             | 0 (0, 1)              | 0 (0, 2)            | 0 (0, 1)             | 0.16        | 0.02 | 0.18 | 0 (0, 1)            | 0 (0, 2)    | 0 (0, 1)    | 0.14        | 0.05 | 0.09 |
| Liver                                   | 0 (0, 0)              | 0 (0, 0)            | 0 (0, 0)             | 0.19        | 0.12 | 0.08 | 0 (0, 0)            | 0 (0, 0)    | 0 (0, 0)    | 0.17        | 0.14 | 0.03 |
| CV                                      | 1 (0, 1)              | 1 (1, 3)            | 1 (1, 1)             | 0.63        | 0.38 | 0.24 | 1 (0, 1)            | 1 (1, 3)    | 1 (1, 2)    | 0.58        | 0.36 | 0.23 |
| CNS                                     | 0 (0, 1)              | 0 (0, 1)            | 0 (0, 1)             | 0.24        | 0.12 | 0.13 | 0 (0, 1)            | 0 (0, 1)    | 0 (0, 1)    | 0.27        | 0.08 | 0.19 |
| Renal                                   | 0 (0, 3)              | 1 (0, 3)            | 1 (0, 3)             | 0.26        | 0.18 | 0.07 | 1 (0, 3)            | 1 (0, 3)    | 1 (0, 3)    | 0.06        | 0.03 | 0.03 |

\* Continuous variables are summarized as mean (SD), categorical variables are summarized as n (%). Both weighted and unweighted cohorts are summarized. Data from a single imputation are summarized. Prior to imputation, data were complete for all characteristics except BMI (n=2,640), admission source (n=2,670), and APS (n=2,640).

‡ Standardized differences are from comparisons of Ketamine vs. Propofol, Etomidate vs. Propofol, and Etomidate vs. Ketamine respectively

† Readmission defined as any ICU admission other than the patient's first ICU admission during a single hospitalization

§ Hours in ICU prior to intubation

\*\* Only available data is summarized (n=921, 763, and 867 for Propofol, Ketamine, and Etomidate groups respectively).

Table 1S-B: Severity Scores by single intravenous anesthetic agent used in all patients

| <b>Patients characteristics<br/>(All patients)</b> | <b>Overall<br/>(N=2,673)</b> | <b>Propofol<br/>(N=962)</b> | <b>Ketamine<br/>(N=792)</b> | <b>Etomidate<br/>(N=919)</b> | <b>P value</b> |
|----------------------------------------------------|------------------------------|-----------------------------|-----------------------------|------------------------------|----------------|
| Age, year                                          | 63<br>(16; 63, 64)           | 61<br>(16; 60, 62)          | 64<br>(15; 63, 65) *        | 65<br>(16; 63, 66) †         | <0.0001        |
| Male                                               | 1565 (59)                    | 562 (58)                    | 471 (59)                    | 532 (58)                     | 0.7992         |
| BMI, kg/m <sup>2</sup>                             | 29<br>(12; 29, 30)           | 30<br>(15; 29, 31)          | 29<br>(12; 29, 30)          | 29<br>(8; 29, 30)            | 0.9625         |
| APACHE III                                         | 83<br>(28; 82, 84)           | 78<br>(26; 77, 80)          | 88<br>(29; 86, 90) *        | 85<br>(28; 83, 86) †         | <0.0001        |
| SOFA, day 1                                        | 8<br>(4; 8, 8)               | 7<br>(4; 7, 8)              | 9<br>(4; 8, 9) *            | 8<br>(4; 8, 8) †‡            | <0.0001        |

BMI: Body Mass Index, APACHE III: Acute Physiology And Chronic Health Evaluation III, SOFA: Sequential Organ Failure Assessment Score. Values are expressed as mean (standard deviation; 95% confidence interval). For comparisons between the three treatments, Kruskal Wallis test was used, or chi-square test as appropriate, with significance level set to 0.05. For each of the pairwise comparisons, statistical significance was defined by  $p < 0.017$  after Bonferroni correction (\*ketamine vs. propofol, †etomidate vs. propofol, ‡etomidate vs. ketamine).

Table 2S: Co- medications for intubation by single intravenous anesthetic agent used in patients non-intubated for cardiac arrest

| <b>Co-medications<br/>in intubated patients,<br/>N (% anesthetic agent)</b> | <b>Overall<br/>(N=2,598)</b> | <b>Propofol<br/>(N=944)</b> | <b>Ketamine<br/>(N=772)</b> | <b>Etomidate<br/>(N=882)</b> | <b>P Value</b>    |
|-----------------------------------------------------------------------------|------------------------------|-----------------------------|-----------------------------|------------------------------|-------------------|
| <b>Other sedatives</b>                                                      | <b>1,271 (49)</b>            | <b>327 (35)</b>             | <b>495 (64) *</b>           | <b>449 (51) †£</b>           | <b>&lt;0.0001</b> |
| Midazolam                                                                   | 1,250 (48)                   | 321 (34)                    | 486 (63) *                  | 443 (50) †£                  | <0.0001           |
| Lorazepam                                                                   | 13 (<1)                      | 5 (<1)                      | 5 (<1)                      | 3 (<1)                       | §0.6496           |
| Dexmedetomidine                                                             | 8 (<1)                       | 1 (<1)                      | 4 (50)                      | 3 (<1)                       | §0.2670           |
| <b>Analgesics</b>                                                           | <b>1,709 (66)</b>            | <b>619 (66)</b>             | <b>506 (66)</b>             | <b>584 (66)</b>              | <b>0.9461</b>     |
| Fentanyl                                                                    | 1,696 (65)                   | 613 (65)                    | 504 (65)                    | 579 (66)                     | 0.9506            |
| Morphine                                                                    | 13 (<1)                      | 6 (<1)                      | 2 (<1)                      | 5 (<1)                       | §0.5374           |
| <b>Neuromuscular blocking agents</b>                                        | <b>2,091 (81)</b>            | <b>765 (81)</b>             | <b>656 (91)</b>             | <b>670 (76) †£</b>           | <b>&lt;0.0001</b> |
| Succinylcholine                                                             | 1,284 (49)                   | 451 (48)                    | 376 (49)                    | 457 (52)                     | 0.2017            |
| Rocuronium                                                                  | 740 (28)                     | 281 (30)                    | 259 (34)                    | 200 (23) †£                  | <0.0001           |

|                |               |               |                            |                                         |                     |
|----------------|---------------|---------------|----------------------------|-----------------------------------------|---------------------|
| Vecuronium     | 60 (2)        | 28 (3)        | 21 (3)                     | 11 (1)                                  | 0.0335              |
| Atracurium     | 4 (<1)        | 3 (<1)        | 0 (0)                      | 1 (<1)                                  | <sup>§</sup> 0.3984 |
| Cisatracurium  | 3 (<1)        | 2 (<1)        | 0 (0)                      | 1 (<1)                                  | <sup>§</sup> 0.7798 |
| <b>Topical</b> | <b>97 (4)</b> | <b>46 (5)</b> | <b>38 (5)</b>              | <b>13 (1) <sup>†</sup> <sup>£</sup></b> | <b>&lt;0.0001</b>   |
| <b>None</b>    | <b>83 (3)</b> | <b>38 (4)</b> | <b>15 (2) <sup>*</sup></b> | <b>30 (4)</b>                           | <b>0.0464</b>       |

Co-medications may be multiple per patient. For comparisons between the three treatments, chi-square test of independence was used, or <sup>§</sup> Fisher's exact test as appropriate, with significance level set to 0.05. For each of the pairwise comparisons, chi-square test was used with statistical significance defined by  $p < 0.017$  after Bonferroni correction ( <sup>\*</sup>ketamine vs. propofol, <sup>†</sup>etomidate vs. propofol, <sup>£</sup>etomidate vs ketamine).

Table 3S: Complications post -intubation by single intravenous anesthetic agent used in patients non-intubated for cardiac arrest

| <b>Complications after intubation<br/>N (% anesthetic agent)</b> | <b>Overall<br/>(N=2,598)</b> | <b>Propofol<br/>(N=944)</b> | <b>Ketamine<br/>(N=772)</b> | <b>Etomidate<br/>(N=882)</b> | <b>P Value</b> |
|------------------------------------------------------------------|------------------------------|-----------------------------|-----------------------------|------------------------------|----------------|
| No immediate complication                                        | 2406 (93)                    | 877 (93)                    | 723 (94)                    | 806 (91)                     | 0.1936         |
| Difficult airway                                                 | 216 (8)                      | 89 (9)                      | 74 (10)                     | 53 (6) †£                    | 0.0095         |
| Immediate oxygen desaturation (SpO <sub>2</sub> <90%)            | 92 (4)                       | 32 (3)                      | 21 (3)                      | 39 (4)                       | 0.1662         |
| Immediate witnessed aspiration                                   | 43 (2)                       | 14 (1)                      | 15 (2)                      | 14 (2)                       | 0.7446         |
| Soft tissue injury with bleeding                                 | 37 (1)                       | 13 (1)                      | 14 (2)                      | 10 (1)                       | 0.5021         |
| Immediate hypotension §                                          | 8 (<1)                       | 4 (<1)                      | 3 (<1)                      | 1 (<1)                       | §0.4498        |
| Immediate cardiac arrest                                         | 5 (<1)                       | 2 (<1)                      | 2 (<1)                      | 1 (<1)                       | §0.8641        |
| Cardiac arrest within 2 hours post intubation                    | 60 (2)                       | 9 (1)                       | 25 (3) *                    | 26 (3) †                     | 0.0022         |
| Cardiac arrest anytime post intubation                           | 109 (4)                      | 26 (3)                      | 36 (5)                      | 47 (5) †                     | 0.0173         |
| Sustained cardio-vascular collapse **                            | 501 (19)                     | 149 (16)                    | 170 (22) *                  | 182 (21) †                   | 0.0023         |

|                                           |         |        |                     |                     |        |
|-------------------------------------------|---------|--------|---------------------|---------------------|--------|
| Sustained severe hypoxia <sup>&amp;</sup> | 188 (7) | 44 (5) | 69 (9) <sup>*</sup> | 75 (9) <sup>†</sup> | 0.0006 |
|-------------------------------------------|---------|--------|---------------------|---------------------|--------|

<sup>§</sup> Immediate hypotension was defined by an immediate drop in systolic blood pressure  $\leq 65$  mmHg recorded at least once and/or a drop in systolic blood pressure  $\leq 40$  mmHg within the first 30 minutes following intubation, <sup>\*\*</sup> Cardiovascular collapse was defined a systolic blood pressure  $\leq 65$  mmHg recorded at least once and/or  $\leq 90$  mmHg lasting 30 minutes despite fluid boluses (at least 500 mL crystalloid and/or colloid solutions and/or vasopressor requirement) between 30- and 120-minutes post intubation. <sup>&</sup> Severe hypoxia was defined as SpO<sub>2</sub>  $\leq 80\%$  within 2 hours post intubation. For comparisons between the three treatments, chi-square test of independence between the three treatments was used, or <sup>§</sup> Fisher's exact test as appropriate, with significance level set to 0.05. For each of the pairwise comparisons, chi-square was used with statistical significance defined by  $p < 0.017$  after Bonferroni correction test (<sup>\*</sup> ketamine vs. propofol, <sup>†</sup> etomidate vs. propofol, <sup>‡</sup> etomidate vs. ketamine).
